# Supplementary material for: Investments in photoreceptors compete with investments in optics to determine eye design
Source: eLife. 2026 May 5;13:RP96517. doi: 10.7554/eLife.96517 (PMC13143276; doi:10.7554/eLife.96517)
Supplement: Figure 3—source data 1. [file elife-96517-fig3-data1.xlsx]

## Sheet: L & D axes
Figure 3		Sheet 1 Values of L and D for cells in data matrices						Sheets 2, 3 & 4 data matrices H(D,L) at three values of KE
	L μm	D μm
	0.43	12		150 values of L
	0.4511	12.85		40 values of D
	0.4733	13.69
	0.4965	14.54
	0.5208	15.38
	0.5464	16.23
	0.5732	17.08
	0.6013	17.92
	0.6308	18.77
	0.6618	19.61
	0.6943	20.46
	0.7283	21.31
	0.7641	22.15
	0.8016	23
	0.8409	23.85
	0.8821	24.69
	0.9254	25.54
	0.9709	26.39
	1.018	27.23
	1.069	28.08
	1.121	28.92
	1.176	29.77
	1.234	30.61
	1.294	31.46
	1.358	32.31
	1.424	33.15
	1.494	34
	1.568	34.85
	1.644	35.69
	1.725	36.54
	1.81	37.38
	1.899	38.23
	1.992	39.08
	2.089	39.92
	2.192	40.77
	2.3	41.62
	2.412	42.46
	2.531	43.31
	2.655	44.15
	2.785	45
	2.922
	3.065
	3.216
	3.374
	3.539
	3.713
	3.895
	4.086
	4.287
	4.497
	4.718
	4.949
	5.192
	5.447
	5.714
	5.995
	6.289
	6.597
	6.921
	7.261
	7.617
	7.991
	8.383
	8.794
	9.226
	9.679
	10.15
	10.65
	11.17
	11.72
	12.3
	12.9
	13.54
	14.2
	14.9
	15.63
	16.39
	17.2
	18.04
	18.93
	19.86
	20.83
	21.85
	22.93
	24.05
	25.23
	26.47
	27.77
	29.13
	30.56
	32.06
	33.63
	35.28
	37.01
	38.83
	40.74
	42.74
	44.83
	47.03
	49.34
	51.76
	54.3
	56.97
	59.76
	62.69
	65.77
	69
	72.39
	75.94
	79.66
	83.57
	87.67
	91.98
	96.49
	101.2
	106.2
	111.4
	116.9
	122.6
	128.6
	134.9
	141.6
	148.5
	155.8
	163.4
	171.4
	179.9
	188.7
	198
	207.7
	217.9
	228.5
	239.8
	251.5
	263.9
	276.8
	290.4
	304.7
	319.6
	335.3
	351.7
	369
	387.1
	406.1
	426
	447.2
	468.7
	490.2
	516
	541.8

## Sheet: KE 0.05
KE = 0.05		cells H(D,L) bits s-1 sr-1
		L 1 to 150
	D 1 to 40	67880	69039	70212	71400	72602	73820	75052	76300	77562	78839	80131	81438	82760	84097	85449	86815	88197	89593	91005	92430	93871	95326	96796	98279	99777	101290	102820	104350	105910	107470	109050	110650	112250	113870	115500	117140	118790	120460	122130	123820	125520	127220	128930	130660	132390	134130	135870	137620
		70273	71503	72748	74008	75284	76575	77881	79202	80539	81891	83259	84642	86040	87454	88883	90328	91789	93265	94756	96264	97787	99325	100880	102450	104040	105640	107250	108890	110540	112200	113880	115580	117290	119010	120760	122510	124280	126070	127870	129680	131510	133350	135210	137080	138960	140850	142750	144670
		72084	73365	74663	75978	77310	78659	80026	81410	82811	84230	85667	87123	88596	90087	91597	93126	94673	96239	97824	99427	101050	102690	104350	106030	107730	109450	111190	112950	114720	116520	118330	120160	122010	123880	125770	127670	129590	131520	133480	135440	137430	139420	141410	143420	145440	147480	149520	151570
		73695	75037	76398	77778	79177	80596	82035	83493	84971	86469	87987	89526	91084	92663	94263	95883	97580	99237	100910	102610	104330	106070	107820	109600	111400	113210	115050	116910	118780	120680	122590	124520	126470	128440	130450	132460	134490	136530	138600	140670	142770	144880	147010	149150	151310	153480	155660	157860
		75229	76630	78050	79491	80952	82434	83936	85459	87003	88568	90154	91762	93391	95041	96713	98407	100120	101860	103620	105400	107200	109030	110880	112750	114640	116550	118490	120450	122430	124430	126450	128500	130570	132660	134760	136890	139040	141210	143400	145600	147830	150070	152330	154610	156910	159220	161550	163890
		76531	77987	79465	80964	82486	84029	85594	87182	88791	90424	92079	93756	95456	97179	98925	100690	102490	104300	106140	108000	109890	111790	113720	115680	117660	119660	121680	123720	125790	127890	130000	132140	134300	136480	138680	140910	143150	145420	147710	150020	152350	154700	157070	159460	161870	164300	166750	169210
		77628	79128	80650	82195	83763	85354	86969	88606	90267	91952	93660	95393	97150	98931	100740	102570	104420	106300	108210	110140	112090	114070	116080	118110	120160	122250	124350	126490	128650	130830	133040	135280	137540	139820	142140	144470	146830	149220	151630	154060	156520	159010	161510	164040	166590	169160	171750	174370
		78503	80050	81620	83216	84835	86480	88149	89844	91564	93309	95081	96878	98702	100550	102430	104330	106260	108220	110200	112210	114250	116310	118400	120520	122670	124840	127040	129270	131520	133800	136110	138450	140810	143200	145620	148060	150530	153020	155540	158090	160660	163260	165880	168520	171190	173880	176590	179330
		79349	80942	82560	84203	85872	87567	89287	91034	92807	94606	96433	98286	100170	102070	104010	105970	107960	109980	112020	114100	116200	118330	120490	122670	124890	127130	129400	131710	134040	136390	138780	141200	143640	146120	148620	151150	153710	156300	158920	161560	164230	166930	169660	172410	175190	178000	180830	183770
		79985	81612	83266	84946	86653	88387	90147	91935	93751	95594	97466	99366	101290	103250	105240	107250	109300	111370	113480	115610	117780	119970	122200	124460	126740	129060	131410	133790	136200	138650	141120	143630	146160	148730	151330	153960	156620	159310	162040	164790	167570	170380	173220	176090	178990	181920	184870	187850
		80438	82102	83794	85513	87261	89037	90842	92675	94538	96431	98353	100310	102290	104300	106340	108420	110520	112660	114830	117030	119260	121530	123820	126150	128510	130910	133330	135790	138280	140800	143360	145950	148570	151220	153910	156620	159370	162160	164970	167820	170690	173600	176540	179510	182510	185550	188610	191700
		80827	82527	84256	86014	87801	89618	91464	93340	95247	97183	99151	101150	103180	105240	107330	109460	111620	113810	116030	118280	120570	122890	125250	127640	130060	132520	135010	137530	140090	142680	145310	147970	150670	153400	156160	158970	161800	164670	167580	170510	173490	176500	179540	182610	185720	188870	192040	195250
		81101	82832	84592	86381	88201	90051	91932	93844	95787	97762	99769	101810	103880	105980	108120	110290	112500	114740	117010	119320	121660	124040	126450	128900	131380	133900	136460	139050	141680	144340	147050	149780	152560	155370	158220	161110	164030	166990	169990	173020	176090	179190	182330	185510	188720	191970	195250	198660
		81248	83006	84795	86615	88466	90348	92262	94209	96188	98200	100250	102330	104440	106590	108770	110990	113240	115530	117850	120210	122610	125040	127510	130010	132560	135140	137760	140410	143110	145840	148610	151420	154270	157160	160080	163040	166050	169180	172260	175380	178540	181730	184970	188240	191540	194890	198270	201680
		81301	83086	84902	86750	88630	90543	92489	94468	96482	98529	100610	102730	104880	107070	109290	111550	113840	116180	118550	120950	123400	125880	128400	130960	133560	136190	138870	141590	144340	147210	150050	152930	155850	158810	161810	164850	167930	171050	174210	177410	180650	183930	187250	190610	194010	197490	200970	204490
		81263	83071	84912	86785	88692	90632	92606	94615	96658	98737	100850	103000	105190	107410	109670	111970	114300	116680	119090	121540	124030	126560	129120	131730	134380	137070	139800	142640	145460	148320	151220	154160	157150	160180	163240	166350	169510	172700	175940	179220	182540	185900	189300	192750	196240	199770	203340	206950
		81131	82960	84822	86718	88648	90613	92612	94647	96718	98825	100970	103150	105370	107620	109920	112250	114620	117030	119480	121970	124510	127080	129690	132350	135040	137780	140640	143470	146340	149260	152220	155230	158380	161470	164610	167790	171010	174280	177590	180950	184350	187790	191280	194810	198390	202010	205670	209380
		80911	82758	84640	86556	88507	90494	92517	94576	96763	98899	101070	103290	105540	107830	110150	112520	114930	117380	119870	122410	124980	127600	130260	132960	135700	138490	141330	144200	147120	150090	153100	156270	159380	162530	165730	168980	172270	175600	178980	182410	185890	189410	192970	196590	200240	203950	207700	211490
		80725	82592	84495	86433	88407	90418	92465	94550	96673	98834	101030	103270	105550	107870	110230	112630	115070	117560	120080	122650	125260	127920	130620	133360	136150	138980	141860	144790	147760	150780	153840	156950	160110	163310	166570	170000	173350	176760	180210	183700	187250	190840	194480	198170	201910	205700	209530	213420
		80406	82290	84209	86164	88156	90186	92253	94359	96504	98687	100910	103170	105480	107830	110210	112640	115110	117630	120190	122790	125440	128130	130870	133650	136480	139350	142280	145250	148260	151330	154440	157600	160930	164200	167510	170880	174290	177750	181270	184830	188450	192110	195830	199590	203410	207270	211190	215150
		80030	81927	83860	85831	87839	89886	91971	94096	96260	98465	100710	103000	105320	107690	110110	112560	115060	117610	120200	122830	125510	128230	131010	133830	136690	139610	142570	145580	148640	151750	155020	158230	161500	164820	168190	171610	175080	178610	182180	185810	189490	193220	197000	200840	204730	208670	212660	216710
		79598	81507	83453	85437	87460	89521	91622	93764	95945	98168	100430	102740	105090	107480	109920	112400	114920	117490	120110	122770	125480	128240	131040	133890	136790	139740	142740	145790	148990	152150	155360	158620	161940	165310	168730	172200	175720	179300	182940	186620	190360	194150	198000	201900	205860	209870	213930	218050
		79111	81030	82987	84982	87017	89091	91206	93361	95558	97796	100080	102400	104770	107180	109640	112140	114690	117280	119920	122610	125340	128130	130960	133840	136770	139760	142790	145960	149110	152310	155560	158860	162220	165630	169100	172620	176190	179820	183500	187240	191030	194880	198780	202740	206750	210820	214940	219120
		78565	80491	82455	84459	86503	88588	90713	92879	95088	97340	99634	101970	104360	106780	109260	111770	114340	116950	119610	122320	125080	127890	130740	133650	136600	139610	142760	145880	149060	152290	155570	158910	162300	165750	169250	172810	176420	180080	183800	187580	191420	195310	199250	203250	207310	211420	215590	219810
		77946	79876	81845	83855	85904	87995	90126	92300	94517	96777	99080	101430	103820	106260	108740	111270	113850	116480	119150	121870	124650	127470	130340	133260	136240	139260	142430	145580	148770	152020	155330	158680	162100	165560	169090	172660	176300	179990	183730	187530	191380	195290	199260	203280	207350	211490	215670	219910
		77234	79164	81133	83143	85193	87284	89417	91592	93810	96072	98378	100730	103120	105560	108050	110590	113170	115800	118470	121200	123980	126800	129680	132600	135580	138610	141790	144940	148140	151390	154700	158060	161470	164940	168460	172030	175660	179350	183090	186880	190730	194630	198580	202580	206640	210750	214910	219130
		76399	78322	80285	82288	84331	86416	88542	90710	92921	95176	97474	99816	102200	104640	107120	109640	112210	114830	117500	120210	122980	125790	128650	131570	134530	137540	140610	143840	147020	150250	153530	156870	160260	163690	167190	170730	174320	177970	181670	185420	189220	193070	196970	200910	204910	208960	213050	217180
		75405	77313	79261	81247	83274	85342	87451	89601	91793	94028	96306	98628	100990	103400	105860	108360	110900	113500	116130	118820	121550	124330	127160	130040	132960	135930	138960	142030	145150	148460	151690	154970	158300	161680	165110	168580	172110	175680	179300	182960	186670	190430	194240	198080	201970	205910	209880	213900
		74214	76097	78018	79978	81977	84016	86094	88213	90373	92574	94817	97102	99429	101800	104210	106670	109170	111720	114310	116940	119620	122340	125110	127930	130790	133700	136650	139650	142820	145930	149080	152270	155510	158800	162130	165500	168920	172380	175890	179430	183020	186650	190320	194030	197770	201560	205370	209230
		72797	74644	76527	78448	80406	82402	84437	86510	88623	90775	92967	95199	97471	99784	102140	104530	106970	109450	111970	114530	117140	119780	122470	125200	127980	130800	133660	136560	139630	142630	145670	148750	151880	155040	158250	161490	164770	168100	171460	174860	178290	181760	185260	188800	192370	195970	199600	203260
		71139	72938	74772	76641	78546	80487	82465	84480	86531	88620	90746	92910	95112	97352	99630	101950	104300	106700	109130	111600	114120	116670	119260	121890	124550	127260	130010	132790	135740	138610	141520	144470	147460	150480	153540	156630	159760	162920	166110	169340	172600	175880	179200	182550	185920	189310	192730	196180
		69243	70984	72758	74565	76406	78281	80190	82134	84112	86125	88173	90257	92375	94529	96719	98944	101200	103500	105830	108200	110610	113050	115520	118030	120580	123160	125780	128430	131240	133970	136730	139530	142360	145230	148120	151050	154000	156990	160000	163040	166110	169200	172320	175460	178620	181800	185000	188220
		67129	68804	70509	72246	74014	75814	77646	79509	81405	83333	85293	87286	89311	91369	93460	95583	97739	99928	102150	104400	106690	109010	111360	113740	116160	118600	121080	123590	126240	128830	131440	134080	136740	139440	142160	144910	147690	150490	153310	156160	159030	161920	164830	167760	170700	173670	176640	179630
		64831	66433	68064	69724	71412	73131	74878	76655	78462	80298	82164	84060	85985	87941	89926	91941	93985	96059	98163	100300	102460	104650	106870	109120	111400	113700	116030	118400	120890	123320	125770	128240	130740	133270	135820	138390	140980	143590	146230	148880	151550	154240	156940	159660	162390	165140	167890	170650
		62389	63914	65466	67045	68651	70283	71943	73629	75343	77084	78851	80646	82468	84318	86194	88097	90026	91983	93966	95975	98011	100070	102160	104270	106410	108570	110760	112970	115310	117580	119870	122180	124510	126870	129240	131630	134040	136470	138920	141380	143860	146350	148850	151360	153890	156420	158960	161510
		59847	61293	62765	64260	65781	67325	68895	70489	72108	73752	75420	77113	78831	80573	82339	84129	85944	87782	89644	91530	93438	95370	97325	99302	101300	103320	105360	107430	109510	111610	113860	116010	118180	120360	122570	124630	126860	129100	131540	133820	136100	138400	140710	143030	145360	147690	150080	152440
		57246	58614	60004	61416	62851	64308	65788	67290	68815	70362	71931	73523	75137	76772	78430	80109	81810	83532	85275	87039	88824	90629	92454	94298	96162	98045	99947	101870	103800	105760	107730	109720	111720	113740	115780	117820	119880	122130	124220	126320	128430	130550	132680	134810	136950	139140	141310	143490
		54626	55916	57225	58555	59906	61277	62668	64080	65513	66965	68438	69930	71443	72975	74526	76098	77688	79297	80925	82572	84236	85919	87619	89337	91071	92822	94589	96372	98170	99983	101810	103650	105510	107380	109260	111150	113200	115120	117050	118990	120940	122890	124850	126840	128820	130820	132810	134810
		52020	53233	54465	55715	56983	58271	59577	60901	62244	63605	64984	66381	67796	69228	70678	72146	73630	75131	76649	78183	79734	81300	82881	84478	86089	87715	89354	91008	92675	94354	96046	97750	99465	101190	102930	104810	106580	108350	110130	111910	113700	115500	117330	119150	120980	122810	124650	126480
		49456	50595	51751	52925	54115	55322	56545	57786	59043	60316	61606	62912	64234	65572	66925	68294	69678	71077	72490	73918	75360	76816	78286	79768	81264	82772	84293	85825	87368	88923	90489	92064	93650	95244	96848	98591	100220	101850	103490	105140	106790	108460	110140	111820	113500	115190	116880	118570
[truncated: 102 more columns]

## Sheet: KE 0.15
KE = 0.15		cells H(D,L) bits s-1 sr-1
		L 1 to 150
	D 1 to 40	71363	72556	73763	74985	76221	77472	78736	80015	81308	82615	83936	85271	86619	87982	89357	90747	92149	93565	94993	96434	97888	99353	100830	102320	103820	105330	106850	108390	109930	111480	113040	114610	116180	117770	119360	120960	122560	124170	125780	127400	129030	130650	132280	133910	135540	137170	138810	140440
		73846	75110	76389	77684	78994	80601	81958	83328	84713	86113	87526	88954	90395	91850	93319	94801	96296	97805	99326	100860	102410	103970	105540	107120	108720	110330	111950	113580	115220	116880	118540	120220	121910	123600	125310	127030	128760	130500	132250	134000	135770	137540	139330	141110	142910	144710	146520	148330
		76156	77487	78834	80198	81578	82974	84387	85817	87262	88725	90204	91700	93212	94742	96288	97850	99430	101030	102640	104270	105920	107580	109260	110960	112670	114400	116150	117910	119690	121490	123300	125130	126970	128830	130700	132590	134490	136400	138330	140270	142220	144180	146150	148130	150120	152110	154090	156070
		77938	79330	80739	82168	83615	85081	86566	88071	89595	91138	92701	94284	95887	97509	99152	100810	102500	104200	105920	107660	109420	111200	113000	114820	116660	118520	120400	122340	124240	126160	128100	130050	132020	134000	136000	138010	140040	142080	144130	146200	148280	150360	152460	154590	156710	158840	160980	163120
		79642	81101	82579	84078	85597	87136	88696	90276	91877	93499	95141	96804	98488	100190	101920	103660	105430	107220	109040	110870	112730	114600	116490	118400	120340	122290	124260	126260	128270	130300	132350	134420	136510	138620	140710	142860	145020	147200	149390	151600	153830	156070	158330	160600	162880	165170	167470	169790
		81123	82639	84178	85738	87320	88924	90550	92199	93870	95564	97280	99019	100780	102570	104370	106200	108060	109920	111820	113740	115690	117660	119650	121670	123700	125760	127840	129940	132070	134210	136380	138560	140770	143000	145240	147510	149790	152090	154410	156750	159100	161470	163850	166250	168660	171090	173520	175970
		82416	83988	85583	87200	88841	90505	92192	93903	95638	97396	99178	100980	102810	104670	106540	108450	110370	112320	114290	116290	118310	120360	122430	124520	126640	128780	130950	133140	135350	137580	139840	142130	144430	146760	149110	151480	153870	156290	158720	161180	163650	166150	168670	171200	173750	176330	178910	181520
		83442	85058	86699	88364	90054	91768	93508	95273	97063	98878	100720	102590	104480	106400	108340	110320	112310	114340	116390	118470	120570	122700	124860	127050	129260	131500	133760	136060	138380	140720	143090	145490	147910	150360	152840	155330	157860	160410	162980	165570	168190	170830	173490	176170	178880	181600	184340	187100
		84351	86020	87714	89434	91180	92953	94753	96580	98433	100310	102220	104160	106120	108110	110130	112180	114250	116360	118490	120650	122830	125050	127290	129560	131860	134190	136550	138930	141340	143780	146250	148750	151270	153810	156390	158990	161620	164270	166950	169650	172380	175140	177910	180710	183530	186380	189240	192130
		85187	86900	88639	90405	92199	94019	95868	97744	99648	101580	103540	105530	107550	109590	111670	113770	115910	118070	120260	122490	124740	127020	129330	131680	134050	136450	138880	141340	143840	146360	148910	151490	154110	156750	159420	162120	164850	167610	170400	173210	176060	178930	181820	184850	187800	190780	193790	196820
		85779	87527	89304	91108	92942	94804	96695	98615	100570	102540	104550	106600	108670	110770	112900	115060	117260	119490	121750	124040	126360	128710	131100	133520	135970	138460	140970	143520	146110	148720	151370	154050	156760	159500	162270	165080	167920	170790	173680	176610	179570	182560	185580	188620	191690	194790	197920	201070
		86232	88020	89837	91684	93561	95468	97406	99375	101380	103410	105470	107570	109690	111850	114040	116270	118530	120820	123140	125500	127890	130320	132770	135270	137790	140350	142950	145570	148240	150930	153660	156420	159220	162050	164910	167810	170740	173700	176700	179720	182780	185870	189000	192150	195340	198550	201800	205070
		86617	88441	90296	92181	94098	96046	98025	100040	102080	104160	106270	108410	110580	112790	115030	117310	119620	121970	124340	126760	129210	131690	134210	136770	139360	141980	144640	147340	150080	152850	155650	158490	161370	164290	167240	170230	173250	176310	179400	182530	185700	188900	192130	195400	198700	202040	205400	208800
		86873	88728	90614	92532	94482	96465	98481	100530	102610	104730	106880	109060	111280	113530	115820	118150	120510	122910	125340	127810	130320	132860	135440	138060	140720	143410	146140	148910	151720	154570	157450	160380	163340	166340	169380	172450	175570	178720	181910	185140	188400	191700	195040	198520	201930	205380	208850	212370
		87007	88890	90807	92756	94739	96755	98806	100890	103010	105170	107360	109580	111840	114140	116480	118850	121260	123710	126200	128720	131280	133890	136530	139200	141920	144680	147480	150320	153190	156110	159070	162070	165100	168180	171400	174560	177760	181000	184280	187600	190960	194350	197790	201260	204770	208320	211910	215530
		87047	88958	90903	92882	94895	96943	99026	101150	103300	105490	107720	109980	112290	114630	117000	119420	121880	124370	126900	129480	132090	134740	137440	140170	142950	145760	148620	151590	154540	157530	160560	163630	166740	169900	173100	176340	179620	182940	186300	189710	193160	196640	200170	203740	207400	211050	214740	218470
		86995	88931	90901	92906	94946	97022	99135	101280	103470	105690	107960	110260	112590	114970	117390	119840	122340	124880	127450	130070	132730	135430	138180	140960	143790	146730	149660	152620	155630	158680	161770	164910	168090	171320	174590	177900	181260	184660	188110	191590	195130	198700	202320	205980	209690	213440	217230	221060
		86849	88806	90798	92827	94891	96993	99132	101310	103520	105780	108070	110400	112770	115180	117640	120130	122660	125240	127860	130520	133230	135970	138760	141660	144550	147480	150460	153480	156650	159760	162920	166120	169370	172670	176010	179400	182830	186310	189830	193400	197020	200680	204390	208140	211940	215780	219670	223600
		86614	88591	90603	92653	94740	96865	99115	101320	103560	105850	108170	110540	112940	115390	117880	120410	122980	125600	128260	130970	133720	136510	139350	142230	145160	148140	151160	154230	157350	160620	163840	167100	170420	173780	177180	180640	184140	187690	191290	194940	198630	202380	206170	210000	213890	217820	221800	225830
		86415	88412	90446	92518	94629	96779	98968	101200	103470	105780	108130	110520	112950	115430	117950	120520	123120	125780	128480	131220	134010	136840	139720	142650	145630	148650	151720	154840	158010	161220	164490	167810	171170	174720	178190	181710	185280	188900	192570	196290	200060	203890	207760	211680	215650	219670	223740	227860
		86080	88094	90145	92235	94365	96534	98744	100990	103290	105620	108000	110410	112880	115380	117930	120530	123170	125850	128580	131360	134190	137060	139980	142950	145970	149040	152150	155320	158540	161800	165240	168610	172040	175520	179050	182630	186270	189960	193690	197490	201330	205220	209170	213170	217230	221330	225490	229700
		85687	87714	89781	91887	94034	96221	98450	100720	103030	105390	107790	110230	112710	115250	117820	120450	123110	125830	128590	131410	134260	137170	140130	143140	146200	149300	152460	155670	159040	162360	165740	169170	172650	176180	179770	183410	187110	190860	194660	198520	202430	206400	210420	214500	218630	222810	227050	231340
		85237	87277	89357	91478	93639	95842	98087	100370	102710	105080	107500	109960	112470	115030	117630	120280	122970	125710	128510	131350	134240	137180	140170	143210	146310	149450	152650	156000	159320	162680	166110	169580	173110	176700	180340	184040	187790	191600	195460	199380	203360	207390	211480	215630	219830	224090	228400	232770
		84732	86782	88874	91006	93180	95397	97656	99959	102310	104700	107130	109620	112140	114720	117340	120010	122730	125500	128320	131190	134100	137070	140100	143170	146300	149560	152800	156100	159460	162870	166330	169850	173430	177060	180750	184490	188300	192160	196080	200050	204090	208180	212330	216530	220800	225120	229500	233930
		84167	86226	88326	90468	92652	94879	97150	99465	101820	104230	106680	109180	111720	114310	116960	119640	122380	125170	128010	130900	133840	136840	139890	142990	146140	149440	152710	156040	159430	162870	166370	169930	173540	177210	180940	184730	188570	192480	196440	200460	204540	208670	212870	217120	221440	225810	230230	234720
		83532	85596	87701	89849	92040	94274	96552	98876	101240	103660	106120	108630	111180	113790	116440	119150	121900	124700	127560	130460	133420	136430	139500	142620	145870	149110	152410	155760	159170	162640	166160	169740	173380	177080	180830	184650	188520	192450	196430	200480	204590	208750	212970	217250	221590	225980	230430	234940
		82808	84872	86979	89128	91320	93557	95838	98164	100540	102950	105420	107930	110490	113100	115760	118470	121230	124040	126900	129810	132780	135790	138870	141990	145260	148510	151810	155170	158590	162060	165590	169180	172830	176530	180290	184100	187980	191910	195900	199940	204050	208210	212420	216690	221020	225400	229840	234330
		81968	84027	86128	88272	90459	92691	94967	97288	99654	102070	104530	107030	109590	112190	114850	117550	120300	123100	125960	128860	131820	134830	137890	141010	144180	147510	150800	154150	157550	161010	164520	168090	171710	175390	179130	182920	186760	190660	194620	198630	202690	206810	210980	215200	219480	223800	228180	232600
		80977	83023	85111	87241	89414	91631	93892	96197	98548	100940	103390	105880	108410	111000	113630	116310	119040	121820	124650	127530	130460	133440	136480	139560	142700	145890	149250	152560	155920	159330	162800	166320	169890	173520	177190	180920	184700	188540	192420	196360	200340	204370	208450	212580	216760	220980	225240	229550
		79799	81822	83886	85992	88139	90330	92563	94841	97162	99528	101940	104390	106900	109440	112040	114680	117370	120110	122890	125730	128610	131540	134520	137550	140630	143760	146940	150300	153590	156930	160320	163760	167250	170790	174370	178010	181690	185420	189190	193010	196880	200790	204740	208740	212770	216850	220960	225110
		78402	80391	82420	84489	86599	88750	90943	93177	95454	97774	100140	102540	104990	107490	110030	112610	115240	117920	120640	123400	126210	129070	131980	134930	137920	140960	144050	147320	150510	153760	157040	160370	163750	167170	170640	174140	177700	181290	184920	188600	192310	196070	199860	203680	207550	211440	215370	219330
		76767	78710	80692	82712	84772	86870	89009	91187	93406	95665	97965	100310	102690	105110	107580	110090	112640	115230	117870	120550	123270	126030	128840	131690	134580	137520	140500	143650	146720	149840	153000	156200	159440	162720	166040	169390	172790	176220	179690	183200	186740	190310	193910	197550	201210	204900	208620	212360
		74890	76778	78701	80661	82658	84693	86764	88873	91021	93206	95430	97692	99994	102330	104710	107130	109590	112090	114620	117200	119810	122470	125160	127890	130670	133480	136330	139340	142280	145250	148270	151320	154400	157520	160680	163870	167090	170350	173630	176950	180300	183670	187070	190500	193950	197420	200910	204420
		72786	74608	76464	78354	80279	82239	84234	86264	88329	90430	92567	94739	96947	99192	101470	103790	106140	108530	110950	113420	115910	118450	121010	123620	126260	128930	131640	134500	137290	140110	142970	145860	148780	151730	154710	157720	160760	163830	166920	170040	173180	176350	179540	182740	185970	189220	192480	195750
		70482	72231	74012	75826	77671	79549	81459	83402	85377	87386	89427	91502	93609	95749	97923	100130	102370	104640	106950	109280	111660	114060	116490	118960	121460	123990	126650	129260	131890	134550	137240	139960	142710	145490	148290	151110	153960	156830	159730	162650	165580	168540	171510	174510	177510	180530	183560	186600
		68014	69686	71387	73118	74879	76669	78490	80341	82221	84132	86073	88045	90046	92078	94140	96231	98353	100500	102690	104900	107140	109410	111700	114030	116380	118770	121270	123720	126190	128690	131220	133770	136340	138940	141560	144200	146860	149540	152240	154960	157690	160440	163200	165980	168770	171560	174370	177180
		65425	67016	68634	70280	71953	73653	75381	77137	78920	80731	82569	84435	86328	88249	90197	92172	94174	96203	98258	100340	102450	104580	106740	108930	111140	113370	115630	118010	120330	122670	125030	127410	129810	132230	134670	137130	139610	142100	144610	147130	149670	152220	154780	157340	159920	162510	165150	167770
		62756	64265	65799	67358	68942	70551	72186	73846	75531	77241	78976	80736	82521	84330	86165	88023	89906	91813	93744	95698	97676	99677	101700	103750	105810	107900	110010	112140	114400	116580	118780	121000	123230	125490	127590	129870	132340	134650	136970	139310	141660	144010	146380	148750	151160	153570	155980	158390
		60047	61473	62923	64396	65892	67411	68953	70518	72106	73716	75350	77005	78684	80384	82107	83851	85618	87405	89214	91044	92895	94766	96656	98567	100500	102450	104410	106400	108400	110420	112460	114510	116570	118660	120750	122860	125150	127290	129440	131610	133770	135950	138140	140350	142570	144790	147010	149240
		57332	58679	60046	61435	62844	64274	65726	67198	68691	70205	71739	73293	74868	76462	78077	79711	81364	83037	84729	86439	88167	89913	91677	93458	95256	97071	98901	100750	102610	104480	106370	108280	110200	112120	114070	116170	118140	120120	122110	124110	126110	128120	130160	132200	134250	136290	138340	140390
[truncated: 102 more columns]

## Sheet: KE 0.3
KE = 0.3		cells H(D,L) bits s-1 sr-1
		L 1 to 150
	D 1 to 40	75925	77153	78395	79650	80919	82200	83494	84802	86122	87454	88799	90157	91527	92908	94302	95707	97123	98550	99987	101430	102890	104360	105840	107320	108810	110310	111820	113330	114850	116380	117900	119440	120970	122510	124040	125580	127110	128650	130180	131710	133230	134750	136260	137770	139270	140760	142250	143720
		78788	80103	81433	82777	84136	85510	86898	88301	89718	91149	92595	94054	95526	97013	98512	100020	101550	103090	104640	106200	107770	109360	110950	112560	114180	115800	117440	119080	120730	122390	124060	125740	127420	129100	130800	132490	134190	135890	137600	139300	141010	142720	144380	146050	147720	149380	151050	152710
		81519	82916	84328	85755	87198	88656	90128	91616	93119	94636	96168	97714	99275	100850	102440	104040	105660	107290	108940	110590	112270	113950	115650	117360	119080	120820	122570	124330	126100	127880	129680	131480	133300	135130	136960	138800	140660	142520	144390	146260	148140	150030	151920	153820	155720	157620	159520	161420
		83569	85026	86500	87991	89501	91028	92572	94135	95715	97314	98930	100560	102220	103890	105570	107280	109000	110750	112510	114280	116080	117890	119720	121570	123430	125310	127210	129130	131060	133000	134960	136930	138920	140920	142930	144950	146980	149050	151080	153120	155160	157210	159260	161320	163370	165430	167490	169550
		85413	86939	88486	90052	91640	93248	94876	96525	98195	99886	101600	103330	105080	106860	108650	110470	112370	114230	116100	117980	119890	121820	123760	125730	127710	129710	131720	133750	135800	137860	139940	142040	144160	146280	148420	150570	152730	154910	157090	159290	161490	163700	165920	168140	170370	172610	174850	177040
		87188	88783	90399	92037	93697	95378	97082	98814	100560	102330	104120	105940	107770	109630	111510	113410	115340	117280	119250	121240	123240	125270	127310	129380	131470	133580	135720	137870	140040	142240	144450	146680	148920	151190	153470	155780	158090	160420	162760	165110	167480	169860	172240	174640	177050	179460	181880	184300
		88724	90382	92063	93768	95496	97248	99023	100820	102650	104490	106340	108230	110150	112100	114070	116060	118070	120110	122180	124260	126370	128510	130660	132840	135040	137260	139500	141770	144060	146360	148690	151030	153400	155780	158180	160600	163080	165530	168000	170480	172980	175490	177950	180490	183030	185580	188140	190710
		90036	91749	93487	95250	97037	98849	100690	102550	104430	106350	108280	110250	112230	114250	116290	118350	120440	122550	124690	126850	129040	131260	133500	135760	138050	140360	142700	145060	147450	149860	152290	154750	157230	159730	162250	164790	167360	169950	172550	175180	177830	180490	183170	185870	188590	191320	194060	196820
		91076	92838	94627	96441	98282	100150	102050	103970	105920	107890	109900	111930	113990	116070	118190	120330	122500	124700	126930	129180	131470	133780	136120	138480	140880	143300	145750	148230	150730	153260	155820	158400	161010	163640	166300	168980	171690	174420	177170	179940	182740	185550	188380	191240	194100	196990	199890	202810
		92040	93858	95703	97577	99478	101410	103370	105350	107370	109420	111490	113590	115730	117890	120080	122300	124550	126830	129140	131480	133850	136250	138670	141130	143620	146130	148670	151240	153840	156470	159130	161810	164520	167260	170020	172810	175630	178470	181340	184230	187140	190070	193030	196010	199010	202030	205070	208170
		92901	94764	96656	98577	100530	102510	104510	106550	108620	110720	112850	115010	117200	119420	121670	123950	126270	128610	130990	133390	135830	138300	140800	143330	145900	148490	151120	153780	156470	159190	161940	164720	167530	170370	173240	176150	179080	182030	185020	188040	191180	194260	197360	200480	203630	206800	209990	213200
		93511	95412	97344	99306	101300	103320	105380	107460	109580	111730	113910	116130	118380	120660	122970	125320	127700	130110	132560	135040	137550	140100	142690	145300	147950	150640	153360	156110	158890	161710	164570	167450	170370	173320	176300	179320	182360	185440	188550	191680	194850	198040	201270	204520	207790	211090	214420	217770
		93988	95931	97906	99913	101950	104020	106130	108270	110440	112640	114880	117160	119460	121810	124180	126600	129040	131520	134040	136590	139180	141800	144460	147160	149890	152650	155450	158290	161160	164060	167000	169980	172990	176030	179110	182220	185370	188550	191760	195010	198280	201590	204930	208300	211700	215130	218590	222080
		94392	96374	98389	100440	102520	104630	106780	108970	111190	113440	115730	118050	120410	122800	125230	127700	130200	132740	135320	137930	140580	143270	145990	148750	151550	154390	157260	160170	163120	166110	169140	172200	175300	178430	181610	184820	188070	191350	194670	198030	201420	204850	208310	211810	215330	218890	222490	226110
		94667	96682	98731	100810	102930	105080	107270	109490	111750	114050	116380	118750	121150	123600	126080	128600	131150	133750	136380	139050	141770	144520	147310	150140	153010	155920	158870	161860	164890	167960	171070	174220	177410	180640	183910	187220	190560	193950	197370	200830	204330	207990	211570	215180	218820	222500	226210	229960
		94815	96861	98942	101060	103210	105400	107620	109880	112180	114520	116900	119310	121760	124250	126780	129350	131960	134610	137300	140030	142810	145620	148470	151370	154310	157290	160310	163370	166470	169620	172810	176040	179310	182730	186090	189490	192930	196410	199930	203500	207100	210740	214420	218140	221890	225690	229520	233380
		94867	96942	99053	101200	103390	105610	107870	110170	112500	114880	117290	119750	122240	124780	127360	129970	132630	135330	138070	140860	143680	146550	149470	152420	155420	158530	161620	164760	167940	171160	174430	177740	181090	184490	187930	191420	194950	198520	202130	205790	209490	213230	217010	220870	224740	228640	232590	236580
		94826	96927	99065	101240	103460	105710	108000	110330	112700	115110	117560	120060	122590	125170	127780	130440	133150	135890	138680	141520	144390	147310	150340	153360	156420	159530	162680	165880	169130	172420	175760	179140	182570	186040	189560	193130	196740	200390	204100	207840	211630	215470	219350	223280	227240	231260	235310	239410
		94689	96813	98976	101180	103420	105700	108020	110380	112780	115220	117710	120240	122800	125420	128070	130770	133520	136310	139140	142020	144950	147920	150940	154000	157190	160360	163570	166840	170140	173500	176900	180360	183860	187410	191100	194740	198440	202180	205970	209800	213690	217620	221590	225620	229690	233800	237960	242170
		94461	96606	98791	101020	103280	105590	107930	110320	112830	115310	117830	120390	122990	125640	128340	131080	133870	136700	139580	142500	145480	148500	151570	154680	157940	161160	164430	167750	171130	174540	178010	181530	185100	188720	192390	196110	199880	203700	207570	211490	215450	219470	223540	227660	231820	236040	240300	244610
		94252	96420	98627	100880	103170	105500	107870	110290	112750	115250	117800	120390	123030	125710	128440	131220	134040	136910	139830	142800	145820	148880	152000	155160	158380	161640	164960	168330	171740	175340	178870	182450	186090	189770	193510	197300	201140	205030	208980	212980	217030	221130	225290	229500	233750	238060	242420	246830
		93915	96100	98327	100590	102910	105260	107660	110100	112580	115110	117680	120310	122970	125690	128450	131260	134120	137020	139980	142980	146040	149150	152300	155510	158780	162090	165450	168870	172460	176000	179580	183220	186920	190670	194470	198330	202240	206210	210230	214300	218430	222620	226860	231150	235500	239900	244350	248860
		93517	95718	97961	100250	102580	104950	107370	109830	112330	114890	117490	120130	122830	125570	128360	131200	134090	137030	140020	143060	146160	149300	152500	155750	159050	162410	165930	169400	172930	176520	180160	183860	187610	191420	195280	199210	203180	207220	211310	215460	219670	223930	228250	232630	237060	241550	246090	250690
		93060	95275	97533	99835	102180	104570	107010	109490	112010	114590	117210	119880	122600	125370	128180	131050	133970	136940	139960	143040	146170	149350	152580	155870	159220	162710	166170	169700	173270	176910	180600	184350	188160	192030	195950	199930	203970	208070	212230	216450	220730	225060	229460	233910	238420	242990	247620	252310
		92548	94775	97046	99360	101720	104130	106580	109070	111620	114210	116860	119550	122290	125080	127920	130810	133760	136760	139810	142910	146070	149280	152550	155880	159340	162790	166300	169860	173480	177160	180900	184700	188560	192480	196460	200500	204590	208750	212970	217250	221590	226000	230460	234980	239560	244210	248910	253670
		91978	94214	96495	98821	101190	103610	106080	108590	111150	113760	116420	119130	121890	124700	127560	130470	133440	136460	139540	142670	145860	149100	152400	155830	159250	162740	166280	169880	173540	177260	181040	184880	188780	192750	196770	200860	205010	209220	213490	217820	222220	226670	231190	235780	240420	245120	249890	254710
		91343	93586	95875	98209	100590	103020	105490	108020	110590	113210	115880	118600	121380	124200	127080	130020	133000	136040	139140	142290	145500	148760	152150	155540	159000	162510	166080	169710	173400	177150	180960	184840	188770	192770	196830	200950	205140	209380	213690	218070	222500	227000	231560	236180	240860	245610	250410	255280
		90629	92876	95168	97506	99892	102320	104810	107330	109910	112540	115220	117950	120740	123570	126460	129400	132400	135450	138560	141730	144950	148230	151630	155040	158510	162040	165630	169270	172980	176750	180580	184470	188430	192440	196520	200660	204860	209130	213450	217840	222290	226810	231380	236010	240710	245460	250270	255140
		89815	92060	94351	96688	99072	101500	103980	106510	109090	111720	114400	117130	119920	122750	125640	128590	131590	134640	137750	140920	144140	147420	150830	154240	157710	161240	164820	168470	172180	175950	179770	183660	187610	191620	195690	199830	204020	208270	212590	216960	221390	225880	230430	235040	239710	244430	249200	254030
		88871	91107	93389	95718	98093	100520	102990	105510	108080	110700	113370	116090	118860	121690	124570	127500	130490	133530	136620	139770	142980	146240	149560	153030	156480	159990	163550	167180	170860	174600	178400	182260	186170	190150	194180	198270	202420	206630	210890	215210	219590	224020	228500	233040	237630	242270	246960	251700
		87762	89982	92246	94557	96914	99317	101770	104270	106820	109410	112060	114760	117510	120310	123160	126060	129020	132030	135090	138210	141380	144600	147880	151220	154720	158180	161700	165270	168900	172590	176330	180120	183970	187880	191840	195850	199920	204040	208220	212440	216720	221050	225420	229850	234320	238830	243390	248000
		86455	88647	90883	93164	95491	97863	100280	102750	105260	107820	110430	113090	115800	118550	121360	124210	127120	130080	133090	136150	139260	142430	145650	148920	152240	155740	159180	162670	166220	169820	173470	177170	180930	184730	188580	192490	196440	200440	204490	208590	212730	216920	221150	225420	229730	234080	238470	242890
		84922	87075	89271	91511	93794	96122	98494	100910	103370	105880	108440	111040	113690	116380	119130	121920	124760	127640	130580	133570	136600	139680	142810	145990	149220	152620	155960	159360	162790	166280	169810	173400	177020	180700	184420	188180	191990	195850	199740	203680	207650	211670	215720	219810	223930	228080	232270	236480
		83149	85252	87396	89581	91808	94078	96390	98745	101140	103590	106070	108600	111180	113790	116460	119170	121920	124720	127560	130450	133390	136370	139390	142460	145580	148860	152080	155350	158660	162010	165400	168840	172320	175850	179410	183010	186650	190330	194050	197800	201590	205410	209260	213140	217050	220990	224950	228930
		81135	83177	85258	87379	89539	91739	93979	96260	98581	100940	103350	105790	108280	110810	113380	115990	118640	121340	124070	126850	129670	132530	135440	138390	141370	144520	147600	150720	153880	157090	160330	163610	166920	170280	173660	177090	180550	184040	187560	191110	194690	198300	201940	205600	209290	212990	216720	220460
		78897	80869	82879	84925	87008	89129	91288	93484	95718	97991	100300	102650	105040	107460	109930	112430	114970	117550	120170	122830	125530	128260	131030	133840	136690	139680	142610	145580	148590	151630	154700	157810	160950	164130	167330	170570	173830	177120	180440	183790	187160	190550	193960	197400	200850	204320	207810	211300
		76463	78359	80289	82254	84253	86288	88357	90462	92601	94776	96986	99232	101510	103830	106180	108570	110990	113450	115940	118470	121030	123630	126260	128930	131720	134460	137240	140050	142890	145760	148670	151600	154560	157550	160560	163600	166670	169760	172870	176010	179160	182340	185530	188730	191960	195190	198440	201690
		73869	75683	77530	79408	81319	83262	85237	87244	89284	91357	93462	95600	97770	99972	102210	104470	106770	109100	111470	113860	116290	118740	121230	123750	126380	128970	131590	134240	136910	139610	142340	145100	147870	150680	153500	156350	159220	162110	165020	167950	170890	173850	176820	179800	182800	185800	188860	191900
		71156	72885	74645	76434	78252	80101	81979	83887	85825	87793	89790	91817	93874	95960	98075	100220	102390	104600	106830	109090	111370	113690	116030	118400	120880	123320	125770	128260	130770	133300	135860	138430	141030	143650	146290	148950	151630	154320	157030	159760	162490	165240	168000	170770	173550	176390	179200	182020
		68363	70007	71678	73376	75102	76855	78636	80443	82278	84140	86030	87946	89889	91859	93855	95878	97927	100000	102100	104230	106380	108550	110750	112980	115230	117590	119890	122220	124560	126930	129320	131730	134150	136590	139050	141530	144020	146530	149040	151570	154110	156670	159220	161820	164410	167010	169620	172220
[truncated: 102 more columns]
