# Supplementary material for: Investments in photoreceptors compete with investments in optics to determine eye design
Source: eLife. 2026 May 5;13:RP96517. doi: 10.7554/eLife.96517 (PMC13143276; doi:10.7554/eLife.96517)
Supplement: Figure 4—source data 1. [file elife-96517-fig4-data1.xlsx]

## Sheet: Sheet1
	Figure 4a						Figure 4b						Figure 4c									Figure 4d				Figure 4e								Figure 4f
	Ctot	D	D	D	D			∆φ	∆φ	∆φ	∆φ		Ctot	L	L	L	L	L	L	L		Ctot	H	L		Ctot	Cph	Cph	Cph	Cph	Cph	Cph		Ctot	ph energy cost	ph energy cost	ph energy cost	ph energy cost	ph energy cost	ph energy cost
	μm3 sr-1	μm	μm	μm	μm			degrees	degrees	degrees	degrees		μm3 sr-1	μm	μm	μm	μm	μm	μm	μm		μm3 sr-1	bits sr-1 s-1	μm		μm3 sr-1	%Ctot	%Ctot	%Ctot	%Ctot	%Ctot	%Ctot		μm3 sr-1	%Ctot	%Ctot	%Ctot	%Ctot	%Ctot	%Ctot
		WOM KE = 0.32	WOM KE = 0	CoG KE = 0.32	CoG KE = 0			WOM KE = 0.32	WOM KE = 0	CoG KE = 0.32	CoG KE = 0			WOM KE = 0.32	WOM KE = 0.08	WOM KE = 0	COG KE = 0.32	COG KE = 0.08	COG KE = 0	COG KE = 0.12			COG KE = 0.12	COG KE = 0.12			WOM KE = 0.32	WOM KE = 0.08	WOM KE = 0	CoG KE = 0.32	CoG KE = 0.08	CoG KE = 0			WOM KE = 0.32	WOM KE = 0.08	WOM KE = 0.04	CoG KE = 0.32	CoG KE = 0.08	CoG KE = 0.04
	1080000	8.44	8.37	10.7	10.6		1080000	3.28	2.86	4.49	3.9		1080000	4.93	14.7	31.2	8.84	29.6046	44.1	20.0728		1080000	26500	20.1		1080000	61	62.5	49	60.4	65.7	46.4		1080000	54.1	43.4	33.9	51.8	44.1	29.1
	2230000	9.66	9.14	12.2	11.8		2230000	2.8	2.53	3.84	3.45		2230000	7.05	20.3	53.4	12.6	42.6018	69.8	28.2136		2230000	41400	28.2		2230000	60.3	62.9	58.5	60.1	67.4	53.8		2230000	51.3	39.4	34.6	48.7	40.8	29.2
	4610000	11	10.1	13.9	13.1		4610000	2.39	2.25	3.29	3.05		4610000	10	27.7	84.5	17.7	62.135	105	39.1812		4610000	63900	39.2		4610000	59.8	63.4	65.4	59.9	69.8	59.8		4610000	48.3	35.2	31.4	45.2	37.9	28.1
	9540000	12.6	11.2	15.8	14.6		9540000	2.04	2	2.81	2.68		9540000	14	37.1	127	24.7	114.272	151	53.6425		9540000	97400	53.6		9540000	59.5	64.1	70.7	59.9	76.5	64.8		9540000	45	30.8	26.3	41.5	41.1	25.9
	19700000	14.4	12.4	18	16.4		19700000	1.74	1.77	2.41	2.37		19700000	19.6	48.5	185	34	143.869	214	70.8425		19700000	147000	70.8		19700000	59.4	64.6	74.8	60.1	76.5	68.9		19700000	41.4	26.3	24	37.5	34.4	23.8
	40900000	16.5	13.9	20.6	18.3		40900000	1.49	1.56	2.07	2.09		40900000	26.8	62.1	263	46	245.693	297	114.436		40900000	220000	114		40900000	59.4	65.1	78.2	60.4	80.7	72.6		40900000	37.5	22	30.3	33.4	35.7	21.2
	84600000	18.9	15.5	23.5	20.6		84600000	1.28	1.38	1.78	1.85		84600000	36.2	67.1	366	61.1	346.941	406	98.8828		84600000	325000	98.9		84600000	59.5	61.9	80.9	60.8	82	75.7		84600000	33.5	16.4	27.3	29.1	31.9	18.5
	175000000	21.3	17.4	26.7	23		175000000	1.13	1.22	1.54	1.63		175000000	56	94.1	502	82.3	481.256	549	455.112		175000000	475000	455		175000000	63.9	65.5	83.3	62.1	83.4	78.5		175000000	32.1	14.3	24.1	25.4	28.2	16.1
	362000000	24.7	19.4	30.7	25.9		362000000	0.938	1.07	1.31	1.44		362000000	63.3	112	680	102	659.276	735	628.617		362000000	697000	629		362000000	60.1	65.3	85.3	61.6	84.7	81		362000000	25.2	11.1	21.1	20.7	24.6	13.8
	749000000	28.3	21.8	35.2	29		749000000	0.806	0.948	1.13	1.27		749000000	81.5	131	915	127	893.626	978	858.495		749000000	1020000	858		749000000	60.5	64.9	87.1	61.9	86	83.1		749000000	21.3	8.51	18.1	16.9	21.1	11.6
	1550000000	32.5	24.5	40.4	32.6		1550000000	0.693	0.837	0.969	1.12		1550000000	103	151	1220	155	1200.56	1290	1161		1550000000	1470000	1160		1550000000	60.8	64.4	88.6	61.9	87.2	85.1		1550000000	17.6	6.43	15.5	13.5	18	9.74
	3210000000	37.3	27.5	46.5	36.6		3210000000	0.596	0.738	0.833	0.984		3210000000	128	172	1620	186	1600.72	1700	1556.64		3210000000	2110000	1560		3210000000	61	63.9	89.9	61.9	88.3	86.8		3210000000	14.2	4.81	13.1	10.6	15.1	8.09
	6640000000	42.9	30.7	53.6	41.1		6640000000	0.513	0.649	0.717	0.868		6640000000	156	197	2130	219	2120.37	2230	2072.34		6640000000	3000000	2070		6640000000	61.1	63.4	91.1	61.6	89.4	88.3		6640000000	11.3	3.58	1.88	8.15	12.6	6.67
	13700000000	49.4	34.6	61.8	46.2		13700000000	0.442	0.574	0.617	0.766		13700000000	188	224	2800	255	2793.15	2910	2741.25		13700000000	4260000	2740		13700000000	61.2	62.9	92.1	61.3	90.5	89.6		13700000000	8.89	2.66	1.37	6.2	10.5	5.47
	28400000000	57	56	71.4	51.9		28400000000	0.38	0.38	0.531	0.675		28400000000	223	255	269	295	3662.31	3780	320.161		28400000000	6040000	320		28400000000	61.2	62.5	63	61	91.4	90.8		28400000000	6.89	1.97	1.01	4.68	8.58	4.48
	58800000000	65.7	64.9	82.5	58.4		58800000000	0.328	0.327	0.457	0.597		58800000000	262	290	301	340	364.834	4910	360.284		58800000000	8600000	360		58800000000	61.1	62.1	62.5	60.6	61.4	91.8		58800000000	5.28	1.46	0.745	3.51	0.942	3.61
	122000000000	75.9	75.2	95.4	94.8		122000000000	0.283	0.282	0.394	0.394		122000000000	307	331	340	390	410.586	418	406.926		122000000000	12200000	407		122000000000	61	61.7	62	60.3	60.8	61		122000000000	4.01	1.09	0.55	2.62	0.687	0.347
	252000000000	87.6	87	110	110		252000000000	0.243	0.244	0.34	0.339		252000000000	354	386	391	447	463.841	470	460.831		252000000000	17400000	461		252000000000	60.7	62	62	60	60.3	60.5		252000000000	3.02	0.813	0.411	1.95	0.509	0.256
																						not plotted
