# Supplementary material for: Investments in photoreceptors compete with investments in optics to determine eye design
Source: eLife. 2026 May 5;13:RP96517. doi: 10.7554/eLife.96517 (PMC13143276; doi:10.7554/eLife.96517)
Supplement: Figure 5—source data 1. [file elife-96517-fig5-data1.xlsx]

## Sheet: Sheet1
	Figure 5a					Figure 5b					Figure 5c					Figure 5d					Figure 5e					Figure 5f						Parameters for 12 fly NS eye regions
	Vtot	D	Vtot	D		Vtot	∆φ	Vtot	∆φ		Vtot	p	Vtot	p		Vtot	L	Vtot	L		D	L	D	L		Vtot	Vph (%Vmax)	Vtot	Vph (%Vmax)		species	eye region	Vtot μm3 sr-1	D μm	∆φ degrees	L μm	p	Vph(%Vtot)
	μm3 sr-1	μm	μm3 sr-1	μm		μm3 sr-1	degrees	μm3 sr-1	degrees		μm3 sr-1		μm3 sr-1			μm3 sr-1	μm	μm3 sr-1	μm		μm	μm	μm	μm		μm3 sr-1		μm3 sr-1			Calliphora	male acute zone	1370000000	37	1.07	340	0.691	73
	KE = 0.32	KE = 0.32	KE = 0	KE = 0		KE = 0.32	KE = 0.32	KE = 0	KE = 0		KE = 0.32	KE = 0.32	KE = 0	KE = 0		KE = 0.16	KE = 0.16	KE = 0	KE = 0		KE = 0.16	KE = 0.16	KE = 0	KE = 0		KE = 0.16	KE = 0.16	KE = 0	KE = 0			female acute zone	452000000	29	1.28	280	0.648	73
	520000	10.7	1080000	10.6		520000	4.49	1080000	3.9		520000	0.834	1080000	0.725		569000	15.7	1080000	44.1		10.4	15.7	10.6	44.1		569000	27.3	1080000	46.4		Musca	male love spot	353000000	36	1.75	250	1.1	65
	1140000	12.2	2230000	11.8		1140000	3.84	2230000	3.45		1140000	0.814	2230000	0.71		1260000	22.1	2230000	69.8		11.9	22.1	11.8	69.8		1260000	32.6	2230000	53.8			male peripheral	10900000	20	3.5	140	1.22	55
	2530000	13.9	4610000	13.1		2530000	3.29	4610000	3.05		2530000	0.795	4610000	0.698		2790000	30.6	4610000	105		13.5	30.6	13.1	105		2790000	37.9	4610000	59.8		Drosophila	average	2090000	16.5	5	83	1.44	60
	5580000	15.8	9540000	14.6		5580000	2.81	9540000	2.68		5580000	0.776	9540000	0.685		6170000	41.9	9540000	151		15.3	41.9	14.6	151		6170000	42.9	9540000	64.8		Coenosia	female frontal	29200000	20	2.3	140	0.803	78
	12300000	18	19700000	16.4		12300000	2.41	19700000	2.37		12300000	0.758	19700000	0.679		13600000	56.4	19700000	214		17.4	56.4	16.4	214		13600000	47.7	19700000	69		Bibio marci	male dorsal	340000000	33	1.6	230	0.922	64
	27200000	20.6	40900000	18.3		27200000	2.07	40900000	2.09		27200000	0.743	40900000	0.67		30000000	74.1	40900000	297		19.9	74.1	18.3	297		30000000	51.8	40900000	72.6			male ventral&female	9910000	21	3.7	110	1.36	56
	60000000	23.5	84600000	20.6		60000000	1.78	84600000	1.85		60000000	0.728	84600000	0.663		65200000	98.7	84600000	406		22.6	98.7	20.6	406		65200000	56.1	84600000	75.7		Dilophus febrilis	male dorsal	61500000	24	2.2	180	0.922	69
	131000000	26.7	175000000	23		131000000	1.54	175000000	1.63		131000000	0.716	175000000	0.655		143000000	118	175000000	549		25.9	118	23	549		143000000	58	175000000	78.5			male ventral & female	1370000	15	5.1	60	1.34	62
	287000000	30.7	362000000	25.9		287000000	1.31	362000000	1.44		287000000	0.702	362000000	0.648		310000000	142	362000000	735		29.8	142	25.9	735		310000000	59.7	362000000	81		Holocephala	acute zone, max acuity	93100000000	75	0.28	230	0.367	56
	622000000	35.2	749000000	29		622000000	1.13	749000000	1.27		622000000	0.692	749000000	0.641		667000000	167	749000000	978		34.3	167	29	978		667000000	60.8	749000000	83.1			periphery	11700000	21	3.5	123	1.28	60
	1340000000	40.4	1550000000	32.6		1340000000	0.969	1550000000	1.12		1340000000	0.683	1550000000	0.635		1420000000	192	1550000000	1290		39.6	192	32.6	1290		1420000000	61.3	1550000000	85.1
	2870000000	46.5	3210000000	36.6		2870000000	0.833	3210000000	0.984		2870000000	0.676	3210000000	0.628		3010000000	218	3210000000	1700		45.8	218	36.6	1700		3010000000	61.4	3210000000	86.8
	6090000000	53.6	6640000000	41.1		6090000000	0.717	6640000000	0.868		6090000000	0.67	6640000000	0.623		6330000000	247	6640000000	2230		53	247	41.1	2230		6330000000	61.3	6640000000	88.3			Details of
	12900000000	61.8	13700000000	46.2		12900000000	0.617	13700000000	0.766		12900000000	0.665	13700000000	0.617		13300000000	279	13700000000	2910		61.3	279	46.2	2910		13300000000	61.1	13700000000	89.6
	27100000000	71.4	28400000000	51.9		27100000000	0.531	28400000000	0.675		27100000000	0.661	28400000000	0.611		27700000000	315	28400000000	3780		71	315	51.9	3780		27700000000	60.8	28400000000	90.8
	56700000000	82.5	58800000000	58.4		56700000000	0.457	58800000000	0.597		56700000000	0.658	58800000000	0.609		57700000000	356	58800000000	4910		82.2	356	58.4	4910		57700000000	60.5	58800000000	91.8
	118000000000	95.4	122000000000	94.8		118000000000	0.394	122000000000	0.394		118000000000	0.656	122000000000	0.652		120000000000	400	122000000000	418		95.2	400	94.8	418		120000000000	59.9	122000000000	61.1
	247000000000	110	252000000000	110		247000000000	0.34	252000000000	0.339		247000000000	0.654	252000000000	0.65		249000000000	458	252000000000	470		110	458	110	470		249000000000	59.9	252000000000	60.5
