# Supplementary material for: Investments in photoreceptors compete with investments in optics to determine eye design
Source: eLife. 2026 May 5;13:RP96517. doi: 10.7554/eLife.96517 (PMC13143276; doi:10.7554/eLife.96517)
Supplement: Figure 6—source data 1. [file elife-96517-fig6-data1.xlsx]

## Sheet: Sheet1
	Figure 6a					Figure 6b					Figure 6c					Figure 6d					Investments made by insects												Figure 6e					Figure 6f
	Vtot	D	Vtot	D		Vtot	∆φ	Vtot	∆φ		Vtot	L	Vtot	L		Vtot	Vph (%Vmax)	Vtot	Vph (%Vmax)														Ctot	Cph (%Ctot)	Cph (%Ctot)	Cph (%Ctot)		Ctot	ph.energy (%Cph)	ph.energy (%Cph)	ph.energy (%Cph)
	μm3 sr-1	μm	μm3 sr-1	μm		μm3 sr-1	degrees	μm3 sr-1	degrees		μm3 sr-1	μm	μm3 sr-1	μm		μm3 sr-1		μm3 sr-1			Tenodera				Sympetrum				Apis				μm3 sr-1					μm3 sr-1
	KE = 0.32	KE = 0.32	KE = 0	KE = 0		KE = 0.32	KE = 0.32	KE = 0	KE = 0		KE = 0.32	KE = 0.32	KE = 0	KE = 0		KE = 0.32	KE = 0.32	KE = 0	KE = 0			Vtot μm3 sr -1	Vph (%Vtot)			Vtot μm3 sr -1	Vph (%Vtot)			Vtot μm3 sr -1	Vph (%Vtot)			KE = 0.32	KE = 0.16	KE = 0.04			KE = 0.32	KE = 0.16	KE = 0.04
	453000	7.49	1080000	7.77		453000	3.8	1080000	3		453000	14.2	1080000	55.1		36900	8.15	1080000	15.4		eye coords z=15	13600000000	47		ventral -60degrees	283000000	55		drone dorsal eye	2850000000	55		1080000	61.4	61.7	42.3		1080000	94.4	91.5	69.9
	992000	8.46	2230000	8.64		992000	3.27	2230000	2.62		992000	20.9	2230000	84		120000	12.1	2230000	21.3		x=20	9810000000	50		ventral -5deg	223000000	56		top border ventral	147000000	41		2230000	60.8	62.2	46.3		2230000	91.2	87.2	63.1
	2180000	9.57	4610000	9.72		2180000	2.82	4610000	2.31		2180000	30.4	4610000	122		364000	16.7	4610000	27.5		x=30	3060000000	43		dv border	370000000	58		mid ventral	44000000	48		4610000	60.6	63.4	49.6		4610000	87	82.2	55.9
	4790000	10.8	9540000	10.9		4790000	2.43	9540000	2.04		4790000	44.1	9540000	173		1050000	21.9	9540000	33.9		x=10	1350000000	42		d +50	1290000000	75		basal ventral	4290000	33		9540000	60.8	65.3	52.6		9540000	81.9	77.1	48.5
	10500000	12.2	19700000	12.3		10500000	2.09	19700000	1.8		10500000	63.7	19700000	240		2910000	27.6	19700000	40.1		x=0	889000000	53		d +70	2440000000	55		worker highest res	216000000	57		19700000	61.4	68.1	56		19700000	76	72.7	41.6
	23200000	13.8	40900000	13.8		23200000	1.81	40900000	1.59		23200000	91	40900000	327		7790000	33.6	40900000	46.1		x=60 facets sim x=0	137000000	48		acute zone, max acuity	179000000000	70						40900000	62.3	68.1	58.5		40900000	69.4	64.6	34.6
	46400000	15.3	84600000	15.5		46400000	1.62	84600000	1.4		46400000	158	84600000	442		19700000	42.5	84600000	51.7														84600000	68.4	73.1	61.5		84600000	66	64.5	28.7
	111000000	17.6	175000000	17.4		111000000	1.36	175000000	1.24		111000000	187	175000000	591		51000000	46	175000000	56.8														175000000	65.8	74	64.4		175000000	55.7	57.6	23.5
	239000000	19.8	362000000	19.6		239000000	1.19	362000000	1.09		239000000	273	362000000	784		125000000	52.5	362000000	61.5														362000000	68.6	75.1	67.3		362000000	49.5	50.6	19
	416000000	21	749000000	22		416000000	1.11	749000000	0.962		416000000	646	749000000	1040		260000000	62.4	749000000	65.8														749000000	79.1	76.3	70.1		749000000	56.2	43.7	15.3
	839000000	23.3	1550000000	24.7		839000000	0.981	1550000000	0.849		839000000	1080	1550000000	1360		560000000	66.8	1550000000	69.6														1550000000	82	77.6	72.8		1550000000	55.9	37.2	12.2
	1910000000	26.4	3210000000	27.8		1910000000	0.847	3210000000	0.749		1910000000	1470	3210000000	1780		1350000000	70.8	3210000000	73														3210000000	82.6	79.1	75.4		3210000000	49	31.2	9.75
	4290000000	29.9	6640000000	31.3		4290000000	0.73	6640000000	0.661		4290000000	1970	6640000000	2320		3190000000	74.4	6640000000	76														6640000000	83.5	80.6	77.8		6640000000	42.4	25.9	7.74
	9570000000	33.9	13700000000	35.1		9570000000	0.635	13700000000	0.583		9570000000	2640	13700000000	3010		7420000000	77.5	13700000000	78.8														13700000000	84.3	82.1	80.1		13700000000	35.9	21.2	6.16
	21000000000	38.1	28400000000	39.5		21000000000	0.548	28400000000	0.515		21000000000	3500	28400000000	3900		16900000000	80.3	28400000000	81.1														28400000000	85.4	83.6	82		28400000000	30.4	17.3	4.85
	46100000000	43.4	58800000000	44.5		46100000000	0.481	58800000000	0.455		46100000000	4630	58800000000	5040		38100000000	82.6	58800000000	83.3														58800000000	86.4	85	83.9		58800000000	25	13.9	3.82
	99600000000	48.8	122000000000	50		99600000000	0.418	122000000000	0.401		99600000000	6070	122000000000	6510		84400000000	84.7	122000000000	85.2														122000000000	87.5	86.4	85.6		122000000000	20.7	11.2	3.01
	214000000000	55.4	252000000000	56.3		214000000000	0.368	252000000000	0.354		214000000000	7930	252000000000	8380		185000000000	86.5	252000000000	86.9														252000000000	88.5	87.8	87.2		252000000000	16.7	9.03	2.38
