# Supplementary material for: Investments in photoreceptors compete with investments in optics to determine eye design
Source: eLife. 2026 May 5;13:RP96517. doi: 10.7554/eLife.96517 (PMC13143276; doi:10.7554/eLife.96517)
Supplement: Figure 7—source data 1. [file elife-96517-fig7-data1.xlsx]

## Sheet: Sheet1
	Figure 7b									Figure 7c													Figure 7d								Figure 7e
	Ctot	L	L	L	L	L	L	L		Vtot	Vph	Vtot	Vph	Vtot	Vph	Vtot	Vph	Vtot	Vph	Vtot	Vph		Ctot	Cph	Cph	Cph	Cph	Cph	Cph		Ctot	ph. energy	ph. energy	ph. energy	ph. energy	ph. energy
	μm3 sr-1	μm	μm	μm	μm	μm	μm	μm		μm3 sr-1	%Vtot	μm3 sr-1	%Vtot	μm3 sr-1	%Vtot	μm3 sr-1	%Vtot	μm3 sr-1	%Vtot	μm3 sr-1	%Vtot		μm3 sr-1	%Ctot	%Ctot	%Ctot	%Ctot	%Ctot	%Ctot		μm3 sr-1	%Ctot	%Ctot	%Ctot	%Ctot	%Ctot
		NS KC = 0.16	NS KC = 0.08	NS KC = 0	S KC = 0.16	S KC = 0.08	S KC = 0.04	S KC = 0		NS KC = 0.32	NS KC = 0.32	NS KC = 0	NS KC = 0	S KC = 0.32	S KC = 0.32	S KC = 0.08	S KC = 0.08	S KC = 0.04	S KC = 0.04	S KC = 0	S KC = 0			NS KE = 0.32	NS KE =0	S KE = 0.32	S KE = 0.16	S KE = 0.04	S KE = 0			NS KE = 0.32	NS KE = 0.04	S KE = 0.32	S KE = 0.08	S KE = 0.04
	1080000	15.7	29.6	44.1	1.61	2.83	4.79	20.5		94100	18.1	1080000	46.4	475000	2.39	564000	6.96	626000	11.2	1080000	36.1		1080000	60.4	46.4	56.9	54.1	48.4	36.1		1080000	51.8	29.1	55.9	47.6	41.9
	2230000	22.1	42.6	69.8	2.02	3.53	5.96	25.6		256000	22.3	2230000	53.8	994000	2.34	1180000	6.8	1310000	10.9	2230000	35.5		2230000	60.1	53.8	56.5	53.6	47.7	35.5		2230000	48.7	29.2	55.4	47	41.3
	4610000	30.6	62.1	105	2.61	4.41	7.47	32.1		679000	26.9	4610000	59.8	2070000	2.31	2470000	6.65	2730000	10.7	4610000	35		4610000	59.9	59.8	56.1	54	47.2	35		4610000	45.2	28.1	55.1	46.5	40.8
	9540000	41.9	114	151	3.17	5.54	9.35	40.3		1760000	31.6	9540000	64.8	4330000	2.27	5140000	6.54	5690000	10.5	9540000	34.6		9540000	59.9	64.8	55.7	52.6	46.6	34.6		9540000	41.5	25.9	54.7	46.1	40.4
	19700000	56.4	144	214	4	6.96	11.7	50.7		4470000	36.2	19700000	69	9040000	2.24	10700000	6.43	11900000	10.3	19700000	34.2		19700000	60.1	68.9	55.3	52.2	46.2	34.2		19700000	37.5	23.8	54.2	45.7	40
	40900000	74.1	246	297	5.03	8.76	14.7	64		11100000	40.7	40900000	72.6	18800000	2.21	22300000	6.33	24700000	10.2	40900000	33.9		40900000	60.4	72.6	55	51.9	45.8	33.9		40900000	33.4	21.2	54	45.3	39.6
	84600000	98.7	347	406	6.35	11	18.6	80.7		26900000	44.9	84600000	75.7	39100000	2.19	46500000	6.26	51300000	10.1	84600000	33.6		84600000	60.8	75.7	54.7	51.6	45.5	33.6		84600000	29.1	18.5	53.7	45	39.4
	175000000	118	481	549	8.18	14	23.5	102		64500000	49.4	175000000	78.5	81400000	2.17	96600000	6.2	106000000	9.96	175000000	33.4		175000000	62.1	78.5	54.5	51.9	45.2	33.4		175000000	25.4	16.1	53.5	44.8	39.1
	362000000	142	659	735	10.2	17.7	29.7	130		148000000	51.7	362000000	81	169000000	2.15	200000000	6.16	221000000	9.89	362000000	33.3		362000000	61.6	81	54.3	51.2	45	33.3		362000000	20.7	13.8	53.3	44.6	39
	749000000	167	894	978	12.9	22.4	37.6	165		337000000	54.2	749000000	83.1	350000000	2.15	415000000	6.13	459000000	9.8	749000000	33.2		749000000	61.9	83.1	54.2	51.1	44.8	33.2		749000000	16.9	11.6	53.2	44.5	38.8
	1550000000	192	1200	1290	16.4	28.6	48	210		752000000	56.1	1550000000	85.1	725000000	2.14	860000000	6.12	948000000	9.84	1550000000	33.2		1550000000	61.9	85.1	54.2	51	44.9	33.2		1550000000	13.5	9.74	53.2	44.5	38.9
	3210000000	218	1600	1700	21	36.4	61.3	269		1650000000	57.4	3210000000	86.8	1500000000	2.14	1780000000	6.13	1960000000	9.85	3210000000	33.3		3210000000	61.9	86.8	54.2	51.1	44.9	33.3		3210000000	10.6	8.09	53.2	44.5	38.9
	6640000000	247	2120	2230	26.8	46.5	78.4	344		3550000000	58.3	6640000000	88.3	3100000000	2.15	3680000000	6.15	4050000000	9.89	6640000000	33.4		6640000000	61.6	88.3	54.3	51.1	45	33.4		6640000000	8.15	6.67	53.3	44.6	39
	13700000000	279	2790	2910	34.3	59.6	100	441		7580000000	58.9	13700000000	89.6	6400000000	2.16	7590000000	6.18	8360000000	9.95	13700000000	33.6		13700000000	61.3	89.6	54.4	51.2	45.2	33.6		13700000000	6.2	5.47	53.4	44.7	39.1
	28400000000	315	3660	3780	43.9	76.9	129	565		16000000000	59.2	28400000000	90.8	13200000000	2.17	15600000000	6.27	17200000000	10	28400000000	33.8		28400000000	61	90.8	54.5	51.4	45.4	33.8		28400000000	4.68	4.48	53.5	45.1	39.3
	58800000000	356	365	4910	56.3	98	165	726		33600000000	59.3	58800000000	91.8	27200000000	2.19	32300000000	6.27	35600000000	10.1	58800000000	34.1		58800000000	60.6	91.8	54.7	51.6	45.6	34		58800000000	3.51	3.61	53.7	45.1	39.5
	122000000000	400	411	418	72.3	126	213	934		70200000000	59.3	122000000000	61.1	56000000000	2.21	66500000000	6.33	73300000000	10.2	122000000000	34.3		122000000000	60.3	61	54.9	51.8	45.8	34.3		122000000000	2.62	0.347	53.9	45.3	39.7
	252000000000	458	464	470	92.3	162	273	1200		146000000000	59.3	252000000000	60.5	115000000000	2.23	137000000000	6.4	151000000000	10.3	252000000000	34.6		252000000000	60	60.5	55.2	51.9	46.1	34.6		252000000000	1.95	0.256	54.1	45.6	39.9
