# Supplementary material for: Investments in photoreceptors compete with investments in optics to determine eye design
Source: eLife. 2026 May 5;13:RP96517. doi: 10.7554/eLife.96517 (PMC13143276; doi:10.7554/eLife.96517)
Supplement: Figure 8—source data 1. [file elife-96517-fig8-data1.xlsx]

## Sheet: Sheet1
	Figure 8a						Figure 8b
Ctot	Hopt	Hopt		Hopt	Hopt		efficiency	efficiency		efficiency	efficiency	Ctot
μm3 sr-1	bits sr-1 s-1	bits sr-1 s-1		bits sr-1 s-1	bits sr-1 s-1		bits sr-1 s-1 μm3	bits sr-1 s-1 μm3		bits sr-1 s-1 μm3	bits sr-1 s-1 μm3	μm3 sr-1
	Simple KC = 0	Simple KC = 0.32		NS KC = 0	NS KC = 0.32		Simple KC = 0	Simple KC = 0.32		NS KC = 0	NS KC = 0.32
1080000	512000	96800		42500	19500		0.475	0.0898		0.0395	0.0181	1080000
2230000	956000	188000		64500	31400		0.429	0.0843		0.0289	0.0141	2230000
4610000	1770000	362000		95900	49900		0.384	0.0785		0.0208	0.0108	4610000
9540000	3260000	691000		141000	78400		0.341	0.0724		0.0148	0.00822	9540000
19700000	5960000	1310000		204000	122000		0.302	0.0662		0.0103	0.00617	19700000
40900000	10800000	2450000		294000	187000		0.265	0.0599		0.0072	0.00458	40900000
84600000	19500000	4550000		421000	284000		0.231	0.0538		0.00498	0.00336	84600000
175000000	35100000	8370000		599000	429000		0.2	0.0478		0.00342	0.00245	175000000
362000000	62500000	15300000		849000	634000		0.173	0.0422		0.00234	0.00175	362000000
749000000	111000000	27600000		1200000	935000		0.148	0.0369		0.0016	0.00125	749000000
1550000000	196000000	49600000		1680000	1370000		0.126	0.032		0.00109	0.000883	1550000000
3210000000	343000000	88300000		2360000	1990000		0.107	0.0275		0.000735	0.000621	3210000000
6640000000	599000000	156000000		3290000	2880000		0.0903	0.0235		0.000496	0.000434	6640000000
13700000000	1040000000	274000000		4590000	4140000		0.0758	0.0199		0.000334	0.000302	13700000000
28400000000	1800000000	477000000		6370000	5950000		0.0633	0.0168		0.000224	0.000209	28400000000
58800000000	3090000000	826000000		8830000	8500000		0.0527	0.0141		0.00015	0.000145	58800000000
122000000000	5300000000	1420000000		12300000	12100000		0.0436	0.0117		0.000101	9.97e-05	122000000000
252000000000	9030000000	2430000000		17400000	17300000		0.0359	0.00967		6.92e-05	6.86e-05	252000000000
